# Supplementary material for: The Relationship between Maternal Nutrition during Pregnancy and Offspring Kidney Structure and Function in Humans: A Systematic Review
Source: Nutrients. 2018 Feb 21;10(2):241. doi: 10.3390/nu10020241 (PMC5852817; doi:10.3390/nu10020241)
Supplement: Supplementary file 1 [file nutrients-10-00241-s001.pdf]

**Table S1.** Results of study quality based on the American Dietetic Association (ADA) Quality Criteria <sup>a</sup>.

| Author                                 | Quality Rating <sup>b</sup> | Relevance Q1 | Relevance Q2 | Relevance Q3 | Relevance Q4 | Validity Q1 | Validity Q2 | Validity Q3 | Validity Q4 | Validity Q5 | Validity Q6 | Validity Q7 | Validity Q8 | Validity Q9 | Validity Q10 |
|----------------------------------------|-----------------------------|--------------|--------------|--------------|--------------|-------------|-------------|-------------|-------------|-------------|-------------|-------------|-------------|-------------|--------------|
| Interventional Studies ( <i>n</i> = 3) |                             |              |              |              |              |             |             |             |             |             |             |             |             |             |              |
| Stewart et al. 2010 [26]               | +                           | No           | Yes          | Yes          | Yes          | Yes         | Yes         | Yes         | Yes         | Unclear     | Yes         | Yes         | Yes         | Yes         | Yes          |
| Stewart et al. 2009 [25]               | +                           | Yes          | Yes          | Yes          | Yes          | Yes         | Yes         | Yes         | Yes         | Unclear     | Yes         | Yes         | Yes         | Yes         | Yes          |
| Hawkesworth et al. 2013 [24]           | +                           | Unclear      | Yes          | Yes          | Yes          | Yes         | Yes         | Yes         | Yes         | Unclear     | Yes         | Yes         | Yes         | Yes         | Yes          |
| Observational Studies ( <i>n</i> = 7)  |                             |              |              |              |              |             |             |             |             |             |             |             |             |             |              |
| Goodyer et al. 2007 [32]               | Ø                           | NA           | Yes          | Yes          | NA           | Yes         | No          | Unclear     | No          | Unclear     | Yes         | Yes         | Yes         | No          | Yes          |
| El-Khashab et al. 2013 [33]            | Ø                           | NA           | Yes          | Yes          | NA           | Yes         | Unclear     | Unclear     | Yes         | Unclear     | Yes         | Yes         | Yes         | Yes         | Unclear      |
| Miliku, K. et al. 2017 [31]            | +                           | NA           | Yes          | Yes          | NA           | Yes         | Yes         | Yes         | Yes         | Unclear     | Yes         | Yes         | Yes         | Yes         | Yes          |
| Miliku, K. et al. 2016 [30]            | +                           | NA           | Yes          | Yes          | NA           | Yes         | Yes         | Yes         | Yes         | Unclear     | Yes         | Yes         | Yes         | Yes         | Yes          |
| Huang et al. 2014 [27]                 | Ø                           | NA           | Yes          | Yes          | NA           | Yes         | Yes         | Yes         | Unclear     | Unclear     | Yes         | No          | Yes         | Yes         | Yes          |
| Painter et al. 2005 [28]               | +                           | NA           | Yes          | Yes          | NA           | Yes         | Yes         | Yes         | No          | Unclear     | Yes         | Yes         | Yes         | Yes         | Yes          |
| Miliku, K. et al. 2015 [29]            | +                           | NA           | Yes          | Yes          | NA           | Yes         | Yes         | Yes         | Yes         | Unclear     | Yes         | Yes         | Yes         | Yes         | Yes          |

<sup>a</sup> American Dietetic Association (ADA) Quality Criteria: Relevance questions (1) Would implementing the studied intervention or procedure (if found successful) result in improved outcomes for the patients/clients/population group? (NA for some Epi studies) (2) Did the authors study an outcome (dependent variable) or topic that the patients/clients/population group would care about? (3) Is the focus of the intervention or procedure (independent variable) or topic of study a common issue of concern to dietetics practice? (4) Is the intervention or procedure feasible? (NA for some epidemiological studies); Validity questions (1) Was the research question clearly stated? (2) Was the selection of study subjects/patients free from bias? (3) Were study groups comparable? (4) Was method of handling withdrawals described? (5) Was blinding used to prevent introduction of bias? (6) Were intervention/therapeutic regimens/exposure factor or procedure and any comparison(s) described in detail? Were intervening factors described? (7) Were outcomes clearly defined and the measurements valid and reliable? (8) Was the statistical analysis appropriate for the study design and type of outcome indicators? (9) Are conclusions supported by results with biases and limitations taken into consideration? (10) Is bias due to study's funding or sponsorship unlikely?

<sup>b</sup> Studies were rated as "positive" if they were assessed as a 'Yes' to all of the following four "essential" criteria, as follows; 1. Was selection of study subjects free from bias?; 2. Were study groups comparable?; 3. Were interventions and any comparisons described in detail?; 4. Were outcomes clearly defined and the measurements valid and reliable?; plus, at least one additional 'yes' from the other six criteria. If six or more of the criteria were assessed as a 'No', the study was rated "negative". Studies were rated "neutral" if the majority of the 10 criteria were met, but one of the "essential" criteria were not met.

NA: not applicable
